# Supplementary material for: Broad-Host-Range Expression Reveals Native and Host Regulatory Elements That Influence Heterologous Antibiotic Production in Gram-Negative Bacteria
Source: mBio. 2017 Sep 5;8(5):e01291-17. doi: 10.1128/mBio.01291-17 (PMC5587914; doi:10.1128/mBio.01291-17)
Supplement: FIG S5 [file mbo004173462sf5.pdf]

|      |                                                          |    |
|------|----------------------------------------------------------|----|
| PviR | -----MGSS-----TAFLL-----                                 | 9  |
| PLR6 | -----MGKAIQTSN---KEVSIFV-----                            | 16 |
| PLR5 | -----MGNGKENSL-----TIL-----                              | 12 |
| PLR3 | -----MGN-----QFL-----                                    | 6  |
| PLR7 | -----M-----KIL-----                                      | 4  |
| LuxR | -----MNIKNINANEKIIDKIKTCN                                | 20 |
| PLR2 | -----MGKPTEQDSYNPFKDGESIRRIIDLFDSEIH                     | 30 |
| CviR | MVTSKPINARPLPAGLTASQQWTLLEWIHMAGHIETEGE-----LKAFLDN----- | 46 |
| PLR1 | -----MGFLGCTKE-----LSSVLKAIELLKTSI                       | 24 |

|      |                                                                |    |
|------|----------------------------------------------------------------|----|
| PviR | -----LDKEPINTIGINV--LQPLLKQGLDVVTGTDISEVPE--D-----             | 46 |
| PLR6 | -----LTHNKTDTDQDFEFIRFVKILEATSNOIKIDTRLPDTPLRQ-----            | 57 |
| PLR5 | IADD--HHLVRQGL-----RSLIERSQTQYNI--SDVATGEQAWQFISQY--           | 53 |
| PLR3 | IADD--HPLFREAL-----KGALQNQFEGLEVIES--ENFEQTIERLSQYD            | 48 |
| PLR7 | VVED--QALVRNAI-----SALLSLE--ANLEVVGQAEDGQQALEY--LANH           | 45 |
| LuxR | NNKDINQ--LSEIAKIIHCE--YYLFAIYYP--HSIIKPDVSI---IDNYPEKWRK--YYD  | 71 |
| PLR2 | HADDLKEA--LTTIARDVGVD--CLAFVDYSP--LPNHIQPVQV---YGHYQEELSV--LFE | 81 |
| CviR | -----ILSQAPSDRIILVLGRLLNNQNIQRMEKVL---NVSYPDWLN--QY--          | 88 |
| PLR1 | IERSLDGIVFQEAMSFABESDELYLALIDKS---SL--EVKTEC---LRSFPQDKE--DLL  | 75 |

|      |                                                                   |     |
|------|-------------------------------------------------------------------|-----|
| PviR | -----TRLLFIETAVNDA--WGKLKEQ--LVNLKVSCDIVLFNLDENPELANRALLSGIR--G   | 98  |
| PLR6 | -----HHLYLVDI--SHREC--QDLLSAE--VSALAAQQNVLLFNAQPSLVNEQTALLARIK--G | 109 |
| PLR5 | Q-----PDLAILDIAMGDL--SGLKVCEHV--KQRKLKTRIIFLSMHDDIKVIHRAFEVGAD--A | 107 |
| PLR3 | D-----LDLLLLDIHMPGN--GDLYGLIR--REDHPSLPVVVSGSEDLNVISKVMGYGAM--G   | 102 |
| PLR7 | E-----PDIVLSDI--TEMPNV--TGLELAQII--QEKYPRVKVIMTTFSRAGYIRRAMADV--G | 99  |
| LuxR | DA-----GLLEYD--VVDYSKSHHSPIN--WN-----VFEKKTIKKESPNVIKEAQESGLITG   | 121 |
| PLR2 | S-----DKVLAHSGSGIRLCS--LA-----KLTGALNIAESLHV-----                 | 113 |
| CviR | ---SQENFAQHDP--IMRIH--LGQGPVI--WE-----ERFSRAKGSEEKRFIAEASSNGMGSG  | 138 |
| PLR1 | TVAKVKKFTNINILKSLC--KDR-----NPLSDI                                | 102 |

:

|      |                                                              |     |
|------|--------------------------------------------------------------|-----|
| PviR | VFYTTDNAD-----VLMKGIRLLMEDQLWYRREIMCNALNRMQLQFNKDA--L        | 143 |
| PLR6 | VIYQNTSAE-----NIFKGIQRVNLGELWFCRTSISQAFNELIQIPNIPRP          | 156 |
| PLR5 | Y-----LSKSEAFDTLNQALQTVAAGHSFI--SPSIESELARYKAAS-----         | 147 |
| PLR3 | F-----IPKASSQDIVSALQQVLDGENWL--PADIKEKINDLDGED-----          | 142 |
| PLR7 | F-----ILKEAPSDYLVNALKKISVGQKVI--DPELAM--NALDDS-----          | 136 |
| LuxR | FSFPIHTASNGFGLMSFAHSDKDIYTDS--LFLHASTNVPLMLPSLVDNYQKIN-----  | 173 |
| PLR2 | --LPLRGIKGIIGALVFNVPC--DLAHKV--TVEQVDWYWTILSPALLN----AA----- | 158 |
| CviR | ITFSAASDRNNVSGSILSIGGKEPGRNAA--LVAMLNCLTPHLHQAAVRIA--NL----- | 188 |
| PLR1 | TIYDLDNPNNSNFLTLVAFNNKRSNRTP--ASYLIELVLPYLHKAQISRYQND-----   | 153 |

|      |                                                              |     |
|------|--------------------------------------------------------------|-----|
| PviR | HKLTEGDIEPVKLTKREKAIISLMSKGAKNKEIAEDLNISPHTVKTHLYSAFRKTKCRNR | 203 |
| PLR6 | QSLDIQDSELELLTAREKSVIKLLASGAKNDDIADSLNISHTVKTHIYSAFKKTNNSRNR | 216 |
| PLR5 | ---T-----QFLLTAREKQIVSYITQKSNRQIADTLCSIKTVDNHRTKAMRKLGVNKA   | 199 |
| PLR3 | ---RELAQQIASLTPOQYKVLQYLHEGLLNQIAYELNISEATVKAHITAIFRKLGVYNR  | 199 |
| PLR7 | -----DPLSDKERKALRLASEG--MKTRQIAESLFLSEGTVRNYLSDAIAKLNATNR    | 186 |
| LuxR | ---TTRKKSDSILTKEKECLAWASEGKSTWDISKILGCSERTVTTFHLTNTQMKNLTNR  | 230 |
| PLR2 | ---LRCRKDHFNITKREKDCVLWASEGKTSWEISQILGITERTVNFHLTNCIEKTSANR  | 215 |
| CviR | ---PPASPSNMPLSQREYDIFHWMSRGKTNWEIATILNISERTVKFHVANVIRKLNANNR | 245 |
| PLR1 | ---KTSRSPIQSLTNREKEVLDWISSGKTNGEIGMILGISQYTVKNHVAKILEKLNAPNR | 210 |

:: :: . \* . : \* \* : \* :

|      |                          |     |
|------|--------------------------|-----|
| PviR | IELLSWAQQNIPDEIR*-----   | 219 |
| PLR6 | IELANWAQKHIPLNSAPVSIQRH* | 239 |
| PLR5 | AELVKYGLEEGLVV*-----     | 213 |
| PLR3 | TQAVLIASKLQLEPIEAAK---*- | 218 |
| PLR7 | VDAARIARQKGWL*-----      | 199 |
| LuxR | CQSISKAILTGAINCPYLK---N* | 250 |
| PLR2 | QQAIVKCLINNLI*-----      | 228 |
| CviR | THAIVLGMHLAMTFRELVN---G* | 265 |
| PLR1 | SAAMALTKELSF*-----       | 223 |
