# Supplementary material for: Broad-Host-Range Expression Reveals Native and Host Regulatory Elements That Influence Heterologous Antibiotic Production in Gram-Negative Bacteria
Source: PubMed Central journal article supplement (PMC5587914; doi:10.1128/mbio.01291-17), 2017-09-05

**A**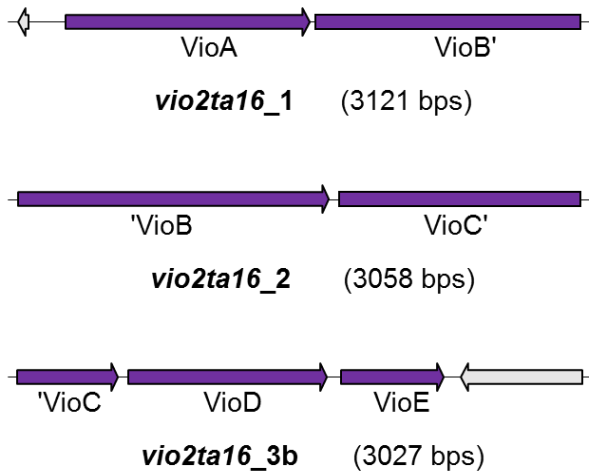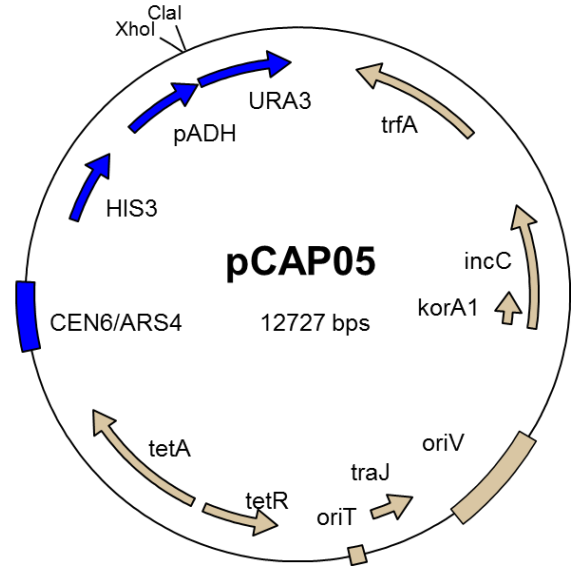**B**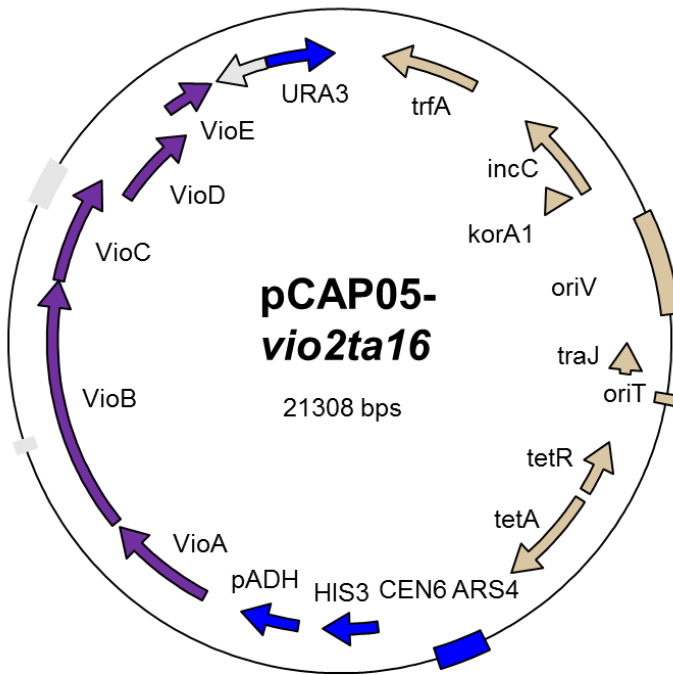

| NdeI |
|------|
| 9653 |
| 6211 |
| 3280 |
| 1487 |
| 677  |

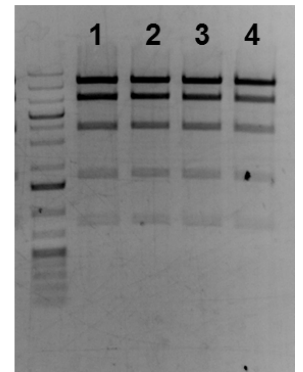

**C**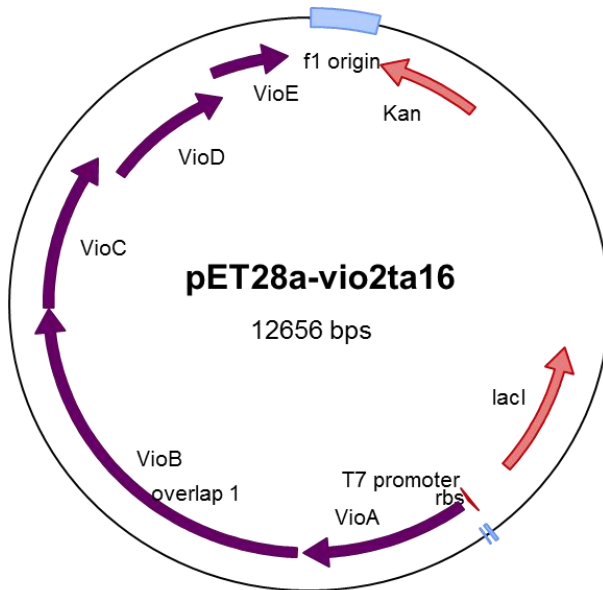

| <b>Dral</b> | <b>EcoRV</b> | <b>NcoI</b> |
|-------------|--------------|-------------|
| <b>9869</b> | <b>7489</b>  | <b>7205</b> |
| <b>1130</b> | <b>3760</b>  | <b>5451</b> |
| <b>1042</b> | <b>1143</b>  |             |
| <b>576</b>  | <b>239</b>   |             |
| <b>39</b>   | <b>25</b>    |             |

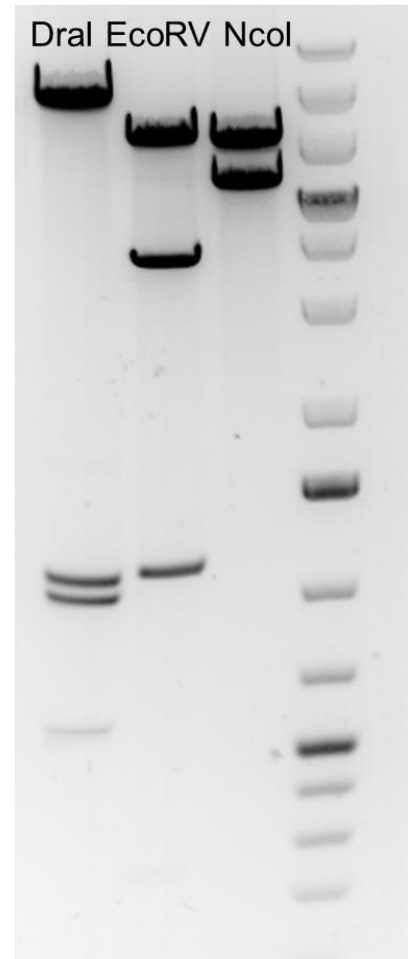

Supplement: mbo004173462sf2.pdf [file mbo004173462sf2.pdf]
