# Supplementary material for: Broad-Host-Range Expression Reveals Native and Host Regulatory Elements That Influence Heterologous Antibiotic Production in Gram-Negative Bacteria
Source: PubMed Central journal article supplement (PMC5587914; doi:10.1128/mbio.01291-17), 2017-09-05
Supplement: mbo004173462sf4.pdf [file mbo004173462sf4.pdf]

Putative conserved domains have been detected, click on the image below for detailed results.

**Protein Classification:** Autoind\_bind and LuxR\_C\_like domain-containing protein  
 Autoind\_bind and LuxR\_C\_like domain-containing protein

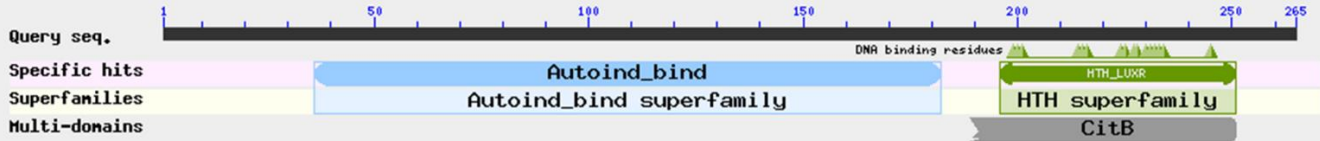

Distribution of the top 10 Blast Hits on 10 subject sequences

Mouse over to see the title, click to show alignments

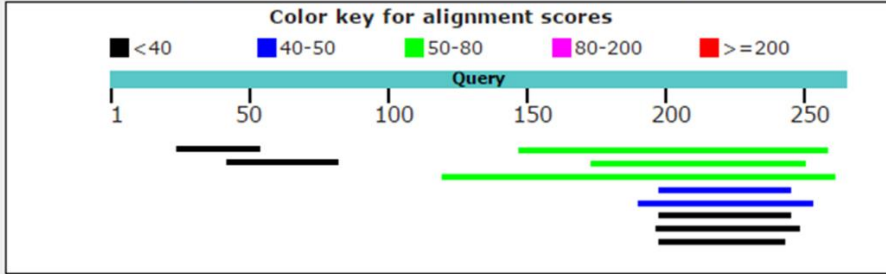

| Name        | Locus Tag (PL2TA16_) | Score | Coverage (%) | E value | Identity (%) |
|-------------|----------------------|-------|--------------|---------|--------------|
| PLR1        | 01227                | 73.9  | 41%          | 2e-16   | 36%          |
| PLR2        | 00118                | 66.2  | 29%          | 9e-14   | 44%          |
| PLR3        | 03988                | 56.2  | 53%          | 3e-10   | 30%          |
| PLR4 (PviR) | 04751                | 43.1  | 18%          | 9e-06   | 48%          |
| PLR5        | 01039                | 40.4  | 23%          | 7e-05   | 33%          |
| PLR6        | 04047                | 38.5  | 18%          | 3e-04   | 40%          |
| PLR7        | 00814                | 38.1  | 19%          | 4e-04   | 40%          |
