# Supplementary material for: Broad-Host-Range Expression Reveals Native and Host Regulatory Elements That Influence Heterologous Antibiotic Production in Gram-Negative Bacteria
Source: PubMed Central journal article supplement (PMC5587914; doi:10.1128/mbio.01291-17), 2017-09-05
Supplement: mbo004173462sf7.pdf [file mbo004173462sf7.pdf]

A



|    | Gene name            | Locus Tag                  | Score                | Coverage (%)       | E value               | Identity (%)       |
|----|----------------------|----------------------------|----------------------|--------------------|-----------------------|--------------------|
| 1  | <a href="#">csgD</a> | <a href="#">b1040</a>      | <a href="#">68.9</a> | <a href="#">63</a> | <a href="#">3e-15</a> | <a href="#">29</a> |
| 2  | <a href="#">yhjB</a> | <a href="#">b3520</a>      | <a href="#">50.8</a> | <a href="#">26</a> | <a href="#">1e-08</a> | <a href="#">42</a> |
| 3  | <a href="#">uhpA</a> | <a href="#">b3669</a>      | <a href="#">49.3</a> | <a href="#">65</a> | <a href="#">3e-08</a> | <a href="#">26</a> |
| 4  | <a href="#">narL</a> | <a href="#">b1221</a>      | <a href="#">49.3</a> | <a href="#">69</a> | <a href="#">4e-08</a> | <a href="#">29</a> |
| 5  | <a href="#">fimZ</a> | <a href="#">b0535</a>      | <a href="#">48.5</a> | <a href="#">96</a> | <a href="#">7e-08</a> | <a href="#">22</a> |
| 6  | <a href="#">uvrY</a> | <a href="#">b1914</a>      | <a href="#">46.2</a> | <a href="#">32</a> | <a href="#">5e-07</a> | <a href="#">35</a> |
| 7  | <a href="#">narP</a> | <a href="#">b2193</a>      | <a href="#">43.9</a> | <a href="#">22</a> | <a href="#">3e-06</a> | <a href="#">43</a> |
| 8  | N/A                  | <a href="#">EO53_03510</a> | <a href="#">42.7</a> | <a href="#">25</a> | <a href="#">4e-06</a> | <a href="#">41</a> |
| 9  | <a href="#">malT</a> | <a href="#">b3418</a>      | <a href="#">41.6</a> | <a href="#">40</a> | <a href="#">3e-05</a> | <a href="#">27</a> |
| 10 | <a href="#">evgA</a> | <a href="#">b2369</a>      | <a href="#">39.3</a> | <a href="#">26</a> | <a href="#">9e-05</a> | <a href="#">33</a> |
|    | <a href="#">sdiA</a> | <a href="#">b1916</a>      | <a href="#">33.5</a> | <a href="#">26</a> | <a href="#">0.008</a> | <a href="#">32</a> |

|    | Gene name            | Locus Tag                   | Score                | Coverage (%)       | E value               | Identity (%)       | Identical protein? |
|----|----------------------|-----------------------------|----------------------|--------------------|-----------------------|--------------------|--------------------|
| 1  | <a href="#">csgD</a> | <a href="#">B21_01044</a>   | <a href="#">70.5</a> | <a href="#">63</a> | <a href="#">7e-16</a> | <a href="#">30</a> | <a href="#">N</a>  |
| 2  | <a href="#">yhjB</a> | <a href="#">B21_03321</a>   | <a href="#">50.8</a> | <a href="#">26</a> | <a href="#">8e-09</a> | <a href="#">42</a> | <a href="#">Y</a>  |
| 3  | <a href="#">uhpA</a> | <a href="#">B21_03495</a>   | <a href="#">49.3</a> | <a href="#">65</a> | <a href="#">2e-08</a> | <a href="#">26</a> | <a href="#">Y</a>  |
| 4  | <a href="#">narL</a> | <a href="#">B21_01209</a>   | <a href="#">49.3</a> | <a href="#">69</a> | <a href="#">3e-08</a> | <a href="#">29</a> | <a href="#">Y</a>  |
| 5  | <a href="#">fimZ</a> | <a href="#">B21_00490</a>   | <a href="#">48.5</a> | <a href="#">96</a> | <a href="#">6e-08</a> | <a href="#">22</a> | <a href="#">N</a>  |
| 6  | N/A                  | <a href="#">B21_RS09895</a> | <a href="#">46.6</a> | <a href="#">32</a> | <a href="#">2e-07</a> | <a href="#">35</a> | <a href="#">N</a>  |
| 7  | <a href="#">uvrY</a> | <a href="#">ECD_01879</a>   | <a href="#">46.2</a> | <a href="#">32</a> | <a href="#">2e-07</a> | <a href="#">35</a> | <a href="#">N</a>  |
| 8  | <a href="#">narP</a> | <a href="#">B21_02079</a>   | <a href="#">43.9</a> | <a href="#">22</a> | <a href="#">2e-06</a> | <a href="#">43</a> | <a href="#">N</a>  |
| 9  | <a href="#">malT</a> | <a href="#">B21_03222</a>   | <a href="#">41.6</a> | <a href="#">40</a> | <a href="#">2e-05</a> | <a href="#">27</a> | <a href="#">N</a>  |
| 10 | <a href="#">evgA</a> | <a href="#">B21_02240</a>   | <a href="#">39.3</a> | <a href="#">26</a> | <a href="#">7e-05</a> | <a href="#">33</a> | <a href="#">Y</a>  |

**B**



| Name                        | Locus Tag                      | Score                       | Coverage (%)              | E value                      | Identity (%)              |
|-----------------------------|--------------------------------|-----------------------------|---------------------------|------------------------------|---------------------------|
| <a href="#">PPR1</a>        | <a href="#">PP_2126</a>        | <a href="#">47.4</a>        | <a href="#">63</a>        | <a href="#">2e-07</a>        | <a href="#">25</a>        |
| <a href="#">PPR2</a>        | <a href="#">PP_2665</a>        | <a href="#">44.3</a>        | <a href="#">29</a>        | <a href="#">2e-06</a>        | <a href="#">35</a>        |
| PPR3                        | PP_2672                        | 43.1                        | 66                        | 6e-06                        | 23                        |
| PPR4                        | PP_1635                        | 42.4                        | 62                        | 9e-06                        | 21                        |
| <b><a href="#">PPR5</a></b> | <b><a href="#">PP_0767</a></b> | <b><a href="#">41.6</a></b> | <b><a href="#">25</a></b> | <b><a href="#">3e-05</a></b> | <b><a href="#">38</a></b> |
| PPR6                        | PP_1090                        | 38.9                        | 26                        | 1e-04                        | 31                        |
| PPR7                        | PP_3847                        | 39.3                        | 24                        | 1e-04                        | 42                        |
| PPR8                        | PP_3412                        | 37.4                        | 28                        | 5e-04                        | 29                        |
| PPR9                        | PP_5241                        | 37                          | 23                        | 9e-04                        | 35                        |
| PPR10                       | PP_0574                        | 36.6                        | 23                        | 1e-03                        | 37                        |
| PPR11                       | PP_2101                        | 36.2                        | 97                        | 1e-03                        | 19                        |
| PPR12                       | PP_2587                        | 36.6                        | 24                        | 1e-03                        | 36                        |
| PPR13                       | PP_0410                        | 36.2                        | 31                        | 1e-03                        | 29                        |
| PPR14                       | PP_4099                        | 35.8                        | 57                        | 1e-03                        | 26                        |
| PPR15                       | PP_3717                        | 35.8                        | 24                        | 2e-03                        | 32                        |
| <b><a href="#">PPRX</a></b> | <b><a href="#">PP_4647</a></b> | <b><a href="#">28.9</a></b> | <b><a href="#">22</a></b> | <b><a href="#">N/A</a></b>   | <b><a href="#">29</a></b> |

C



|                     | Locus Tag               | Score              | Coverage (%)     | E value             | Identity (%)     |
|---------------------|-------------------------|--------------------|------------------|---------------------|------------------|
| <b><u>ATR1</u></b>  | <b><u>X971_4629</u></b> | <b><u>53.9</u></b> | <b><u>47</u></b> | <b><u>3e-09</u></b> | <b><u>27</u></b> |
| <b><u>ATR2</u></b>  | <b><u>X971_3376</u></b> | <b><u>52.4</u></b> | <b><u>25</u></b> | <b><u>9e-09</u></b> | <b><u>45</u></b> |
| <b><u>ATR3</u></b>  | <b><u>X971_2241</u></b> | <b><u>50.8</u></b> | <b><u>25</u></b> | <b><u>1e-08</u></b> | <b><u>45</u></b> |
| ATR4                | X971_3295               | 49.7               | 26               | 4e-08               | 44               |
| ATR5                | X971_2958               | 47.4               | 51               | 2e-07               | 29               |
| ATR6                | X971_2949               | 47                 | 58               | 3e-07               | 28               |
| <b><u>ATR7</u></b>  | <b><u>X971_0445</u></b> | <b><u>42</u></b>   | <b><u>61</u></b> | <b><u>1e-05</u></b> | <b><u>23</u></b> |
| <b><u>ATR8</u></b>  | <b><u>X971_4153</u></b> | <b><u>40</u></b>   | <b><u>25</u></b> | <b><u>5e-05</u></b> | <b><u>39</u></b> |
| ATR9                | X971_0488               | 39.7               | 50               | 9e-05               | 30               |
| ATR10               | X971_0487               | 39.7               | 28               | 1e-04               | 32               |
| <b><u>ATR11</u></b> | <b><u>X971_2373</u></b> | <b><u>36.2</u></b> | <b><u>23</u></b> | <b><u>1e-03</u></b> | <b><u>35</u></b> |
| ATR12               | X971_4763               | 35.4               | 30               | 3e-03               | 35               |
| ATR13               | X971_2720               | 32.3               | 23               | 4e-03               | 31               |
| <b><u>ATRX</u></b>  | <b><u>X971_0678</u></b> | <b><u>30.8</u></b> | <b><u>26</u></b> | <b><u>N/A</u></b>   | <b><u>31</u></b> |
