# Supplementary material for: Broad-Host-Range Expression Reveals Native and Host Regulatory Elements That Influence Heterologous Antibiotic Production in Gram-Negative Bacteria
Source: PubMed Central journal article supplement (PMC5587914; doi:10.1128/mbio.01291-17), 2017-09-05
Supplement: mbo004173462sf8.pdf [file mbo004173462sf8.pdf]

|      |                                                                 |     |
|------|-----------------------------------------------------------------|-----|
| ATR1 | MDDSVNIPKINRLVLQNLIAGLSDGLILLENDGTIAWANKAALQMRHREAMPPELGEDAAA   | 60  |
| LuxR | -----                                                           | 0   |
| CviR | -----                                                           | 0   |
| ATR3 | -----                                                           | 0   |
|      |                                                                 |     |
| ATR1 | YRRNFTLRYRNNHLLDEGQYPLERLLAGETFEDVTVEISPSGDEAECWVHTVRGLVLEDA    | 120 |
| LuxR | -----                                                           | 0   |
| CviR | -----                                                           | 0   |
| ATR3 | -----                                                           | 0   |
|      |                                                                 |     |
| ATR1 | GAKPDVVLVIIRDETPRFEAEARFESAFNANPAPGLICRLEDKRFIRVNQGFLEMTGFSR    | 180 |
| LuxR | -----                                                           | 0   |
| CviR | -----                                                           | 0   |
| ATR3 | -----                                                           | 0   |
|      |                                                                 |     |
| ATR1 | EEIIGISVEELGLFSEC DTG EDALKKLEDGRLIRQREALIPIPGGDRLV-----        | 229 |
| LuxR | -----MNIKNNINANEKIIDKIKTCNN---                                  | 21  |
| CviR | -----MVTSKPINA--R--PLPAGLTASQ                                   | 20  |
| ATR3 | -----MPKTE--R--QARLCRDLSA                                       | 16  |
|      | :                                                               |     |
|      |                                                                 |     |
| ATR1 | -----IVAGETIAVAEEPCLMFTFADLDGRRKAQNALRQSEERFFKSFRLSPVPAAISR     | 283 |
| LuxR | NKDINQCLSEIAKI---IHCEYYLFA-----I-----IYPHSIIK                   | 53  |
| CviR | QWTLLEWIHMAGHIETEGELKAFLDNLSQAPS DRIILVLGRL-----NNQNQIQR        | 71  |
| ATR3 | AIDRPQWL AALQV-----MQAFSYSY-----VTLKLP SI-----RNA---YA          | 52  |
|      | :                                                               |     |
|      |                                                                 |     |
| ATR1 | LDDFVLMEVN---DAFLVLCGRNEAEVVGKTASELRLEWEDAGARRDLEKRLKD          | 333 |
| LuxR | PDVSIIDNYPEKWR-KYYDDAGLLEYDPVVD---YSKSHSPINWNVFEKKT-----        | 101 |
| CviR | MEKVLNVSYPDWL-NQYSQENFAQHDPIM---RIHLGQGPVWEERFSRA-----          | 118 |
| ATR3 | LPIVVESSLP-VWVVMAMTRD GELADCPVIK---RGASSMMPQYWSLDDKDI-----      | 100 |
|      | : . *                                                           |     |
|      |                                                                 |     |
| ATR1 | NIPIRDENMRMNL SGGGLAE CIVSAERAEINDQLCVIWA IQDVTERRRTENELIEAIESV | 393 |
| LuxR | -IKKESPNVIKEAQESGLITGFSFPIHTASNGFGMLSFAHSDK--DIYTDSLFLHAS---    | 155 |
| CviR | -KGSEEKRFIAEASSNGMGSGITFSAASDRNNVGSILSIGGKE--PGRNAALV-----      | 168 |
| ATR3 | -NSGSLLEVSTLLRGMGITSGLLV PVNGMDG-NRHLMNFAGDC--DVLSQGS L-----    | 149 |
|      | . . * : : . : . . .                                             |     |
|      |                                                                 |     |
| ATR1 | MTDTSWFSRTV---VERLAGLRQNSRGTTSSASLKD LTEREEQILSLICDGCSDKEMSDR   | 450 |
| LuxR | -TNVPLMLPSLVDNYQKIN-----TTRKKS DSILTKREKECLAWASEGKSTWDISKI      | 206 |
| CviR | -AMLNCLTPHLHQAAVRIAN-----LPPASPSNMPLSQREYDIFHWMSRGKTNWEIATI     | 221 |
| ATR3 | -NELCMIALHALEYDRLC-----RAGSKLPSPLTKRELDVVRWTAQGKTSVEIAEL        | 200 |
|      | : : : * : * * : . . * : : :                                     |     |
|      |                                                                 |     |
| ATR1 | LNLSKHTIRNH IASLYGKIGVNRRTAAVIWARERGFTHREK*--                   | 492 |
| LuxR | LGCSERTVTFHLTNTQMKLNTTNRCQSISKAILTGAINCPYLKN*                   | 250 |
| CviR | LNISERTVKFHVANVIRKLNANNRTHAIVLGMHLAMTPREL VNG*                  | 265 |
| ATR3 | LSISEHTVNTYMNNAIRKLDVCVNRAQLVAKTIRLGLIS*-----                   | 238 |
|      | * . * : * : : : . * : . * : :                                   |     |
