# Supplementary material for: Broad-Host-Range Expression Reveals Native and Host Regulatory Elements That Influence Heterologous Antibiotic Production in Gram-Negative Bacteria
Source: PubMed Central journal article supplement (PMC5587914; doi:10.1128/mbio.01291-17), 2017-09-05

**A**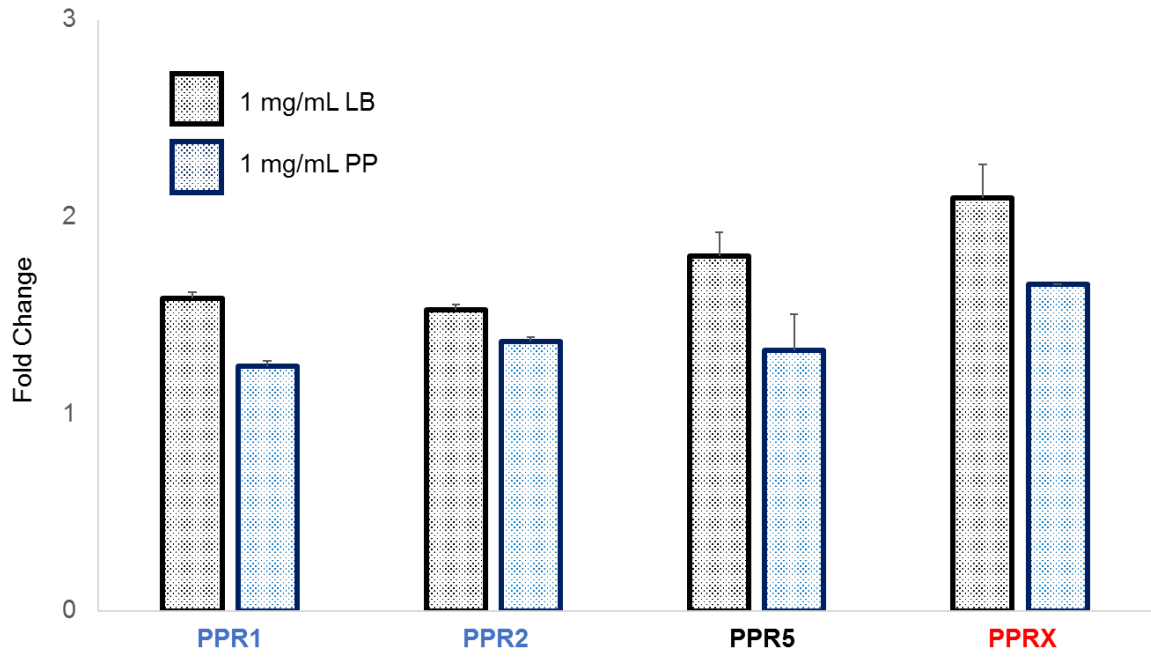**B**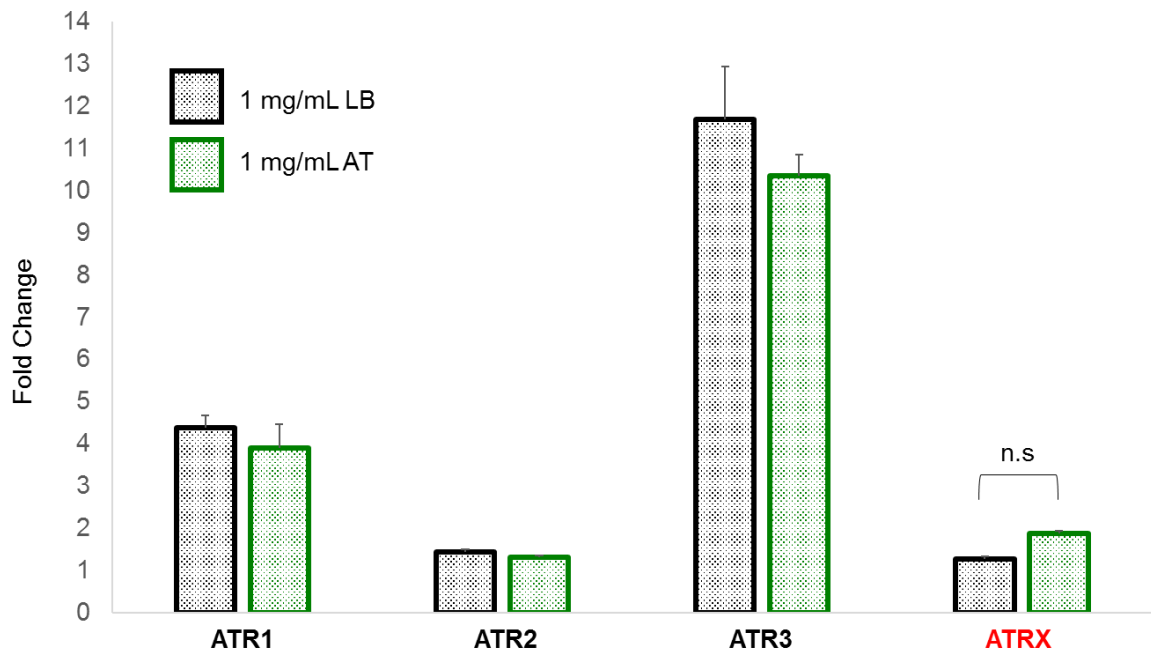

Supplement: mbo004173462sf9.pdf [file mbo004173462sf9.pdf]
