# Supplementary material for: Broad-Host-Range Expression Reveals Native and Host Regulatory Elements That Influence Heterologous Antibiotic Production in Gram-Negative Bacteria
Source: PubMed Central journal article supplement (PMC5587914; doi:10.1128/mbio.01291-17), 2017-09-05
Supplement: mbo004173462st1.pdf [file mbo004173462st1.pdf]

| Name                  | Sequence                                                                   |
|-----------------------|----------------------------------------------------------------------------|
| pCAP05-1_5121F        | <b>AGCTCCAATTCGCCCTATAGATCACGAGCAATAAACCCGC</b>                            |
| pCAP05-1_5121R        | <b>CTGGAAAGCGGGCAGTGAGCGGCCTTTTGCTCACATGTTC</b>                            |
| pCAP05-2_3943F        | <b>GAACATGTGAGCAAAGGCCGCTCACTGCCCGCTTTCCAG</b>                             |
| pCAP05-2_3943R        | <b>CCTATTTGTTTATTTTTCTAACGATTGATGGCGGTCCTGG</b>                            |
| pCAP05-3_2024F        | <b>CCAGGACCGCCATCAATCGTTAGAAAAATAAACAAATAGG</b>                            |
| pCAP05-3_2024R        | <b>GGGTTAATTCGAGCTTGGCTATTTTACACCCGCATATGAT</b>                            |
| pCAP05-4_1639F        | <b>ATCATATGCGGTGTGAAATAGCCAAGCTCGGAATTAACCC</b>                            |
| pCAP05-4_1639R        | <b>GCGGGTTTATTGCTCGTGATCTATAGGGCGAATTGGAGCT</b>                            |
| vio2ta16-1_3121-40F   | <b>CTCGGTTTGACGCCTCCCATGGTATAAATAGTGGCTCGAGCCTAACTAACCGCCAT<br/>GTG</b>    |
| vio2ta16-1_3121-134R  | CTGTAGTAGCTGCGTATGTCCAGTGACTGT                                             |
| vio2ta16-2_3058-134F  | TGCTCAGAGCGGCACACTTG                                                       |
| vio2ta16-2_3058-108R  | TCTGGCGGGTAATGATCTGG                                                       |
| vio2ta16-3b_3027-482F | GCGGTTTGCCTTCCTTATACGGGTCAAGTG                                             |
| vio2ta16-3b_3027-40R  | <b>AGTAGCAGCACGTTCCCTTATATGTAGCTTTTCGACATCGATCCGCGGGTTTCCTAAAT<br/>TAC</b> |
| vio2ta16check_402F    | CTCGGGAGATGCCAGAAGTC                                                       |
| vio2ta16check_402R    | GCTCGCCCAATGCCATAAGG                                                       |
| pET28a-vioE-F         | <b>TGAAATTTTTCAACCGACTCCATTAACAACCTGAGTAAGCACTCGAGCACCACCA<br/>CCA</b>     |
| pET28a-vioA-R         | <b>CCGCTCCGATGATTGAGATGGTGTGTTTTCTTAACCGTCATGTATATCTCCTTCTTAAA<br/>GT</b>  |
| PLR1(NcoI)_669F       | <b>ACCTGCCCATGGGC</b> TTTTTTGGGCTGCACAAAAGA                                |
| PLR1(HindIII)_669R    | <b>GGCCGCAAGCTT</b> TTAGCTAAAGCTCAGCTCTTTG                                 |
| PLR2(NcoI)_684F       | <b>ACCTGCCCATGGGCA</b> AACCTACCGAACAAGATAG                                 |
| PLR2(HindIII)_684R    | <b>GGCCGCAAGCTT</b> CTAAATAAGGTTGTTTATTAAACT                               |
| PLR3(NcoI)_654F       | <b>ACCTGCCCATGGGCA</b> ATCAGTTTTTAATTGCGGATGA                              |
| PLR3(HindIII)_654R    | <b>GGCCGCAAGCTT</b> CTACTTTGCCGCCTCGATT                                    |
| PLR4(NcoI)_657F       | <b>ACCTGCCCATGGGC</b> AGCAGTACTGCATTTTTATTG                                |
| PLR4(HindIII)_657R    | <b>GGCCGCAAGCTT</b> TTAACGTATCTCGTCAGGGA                                   |
| PLR5(NdeI)_642F       | <b>CGGAATTCATATGGGTA</b> ACGGAAAAGAAAATAG                                  |
| PLR5(XhoI)_642R       | <b>AACCGCTCGAG</b> CTACACAAGTCCCTTCTT                                      |
| PLR6(NcoI)_717F       | <b>ACCTGCCCATGGGCA</b> AAGCGATTCAAAGTAGCAA                                 |
| PLR6(HindIII)_717R    | <b>GGCCGCAAGCTT</b> TTAATGACGCTGTATTGAGA                                   |
| PLR7(NdeI)_600F       | <b>CGGAATTCATATG</b> AAAATTTTAGTTGTAGAAGATCAA                              |

|                    |                                                |
|--------------------|------------------------------------------------|
| PLR7(XhoI)_600R    | <b>AACCGCTCGAG</b> TTACAGCCAACCCTTTTGTC        |
| qRT-cysG_126F      | TCCACAGTTCACCGCATGGG                           |
| qRT-cysG_126R      | CGCTGGTTAAGCGCGTCATC                           |
| qRT-vioA_140F      | CTGACAATGCTGGCTATGAG                           |
| qRT-vioA_140R      | CGCAGTATCAGCTTCTAGAC                           |
| csgD(NdeI)_651F    | <b>CGGAATTCATATG</b> TTTAATGAAGTCCATAGTATTCATG |
| csgD(XhoI)_651R    | <b>AACCGCTCGAG</b> TTATCGCCTGAGGTTATCGT        |
| yhjB(NcoI)_603F    | <b>ACCTGCCATGGGCC</b> AAATAGTCATGTTTGACAG      |
| yhjB(HindIII)_603R | <b>GGCCGCAAGCTTT</b> CAGGAGGAGATATTTAACA       |
| uhpA(NcoI)_591F    | <b>ACCTGCCATGGGCC</b> ATCACCGTTGCCCTTATAGA     |
| uhpA(HindIII)_591R | <b>GGCCGCAAGCTTT</b> CACCAGCCATCAAACATGC       |
| sdiA(NcoI)_723F    | <b>ACCTGCCATGGGCC</b> CAGGATAAGGATTTTTTCAGCT   |
| sdiA(HindIII)_723R | <b>GGCCGCAAGCTTT</b> CAAATTAAGCCAGTAGCGG       |
| PPR1(NdeI)_660F    | <b>CGGAATTCATATG</b> ACCTGTAGACTACTGCT         |
| PPR1(XhoI)_660R    | <b>AACCGCTCGAG</b> TCAGTCATCCAGGCTGATGA        |
| PPR2(NcoI)_666F    | <b>ACCTGCCATGGGCT</b> TACAAAATTCTGATTGCCGAC    |
| PPR2(HindIII)_666R | <b>GGCCGCAAGCTTT</b> CAACGGCGCAGATAATCA        |
| PPR5(NdeI)_2718F   | <b>CGGAATTCATATG</b> ACAGATCTGTCCCGTACCCA      |
| PPR5(XhoI)_2718R   | <b>AACCGCTCGAG</b> TCACGCCAGCAACCCAGG          |
| PPRX(NcoI)_708F    | <b>ACCTGCCATGGGCC</b> TTCACTGGAAACCCGA         |
| PPRX(HindIII)_708R | <b>GGCCGCAAGCTTT</b> CAGATCCAGCCACGCAAGG       |
| ATR1(NdeI)_1479F   | <b>CGGAATTCATATG</b> GACGACAGCGTAAACAT         |
| ATR1(XhoI)_1479R   | <b>AACCGCTCGAG</b> TTATTTTTCCCTATGGCCGG        |
| ATR2(NdeI)_930F    | <b>CGGAATTCATATG</b> AGCGGGCAAGGCGCAG          |
| ATR2(XhoI)_930R    | <b>AACCGCTCGAG</b> TCACCCCTGATGCAAATATGCGCG    |
| ATR3(NcoI)_717F    | <b>ACCTGCCATGGGCC</b> CCGAAGACGGAGCGCCAGG      |
| ATR3(HindIII)_717R | <b>GGCCGCAAGCTTT</b> CAGCTTATCAGGCCAAGGCG      |
| ATRX(NcoI)_756F    | <b>ACCTACCATGGGCA</b> AAGAACCGCTTCATGCA        |
| ATRX(HindIII)_756R | <b>GGCCGCAAGCTTT</b> CTATTTAATCAGACCGACCC      |

| Name            | Description                                                                                                                                   | Reference  |
|-----------------|-----------------------------------------------------------------------------------------------------------------------------------------------|------------|
| pARS-VN         | Plasmid used to amplify selective, counter-selective, and maintenance elements for yeast TAR cloning in construction of pCAP05                | (1)        |
| pRK442(H)       | Plasmid used to amplify broad-host-range origin of replication and maintenance elements for Gram-negative bacteria in construction of pCAP05  | (2)        |
| pCAP05          | TAR cloning and broad-host-range heterologous expression vector; CEN6_ARS4, HIS3, pAHD1, URA3, oriV, traJ, oriT, tetR, tetA, trfA, incC, korA | This study |
| pCAP05-vio2ta16 | pCAP05 containing violacein gene cluster from <i>P. luteoviolcea</i> 2ta16; Tet <sup>R</sup>                                                  | This study |
| pET28a-vio2ta16 | pET28a containing violacein gene cluster from <i>P. luteoviolcea</i> 2ta16 under control of T7 promoter; Kan <sup>R</sup>                     | This study |
| pACYCDuet-1     | Commercial expression vector used for co-expression of LuxR homologs; Cm <sup>R</sup>                                                         | Novagen    |

1. Noskov VN, Kouprina N, Leem SH, Ouspenski I, Barrett JC, Larionov V. 2003. A general cloning system to selectively isolate any eukaryotic or prokaryotic genomic region in yeast. *BMC Genomics* 4:16.
2. Scott HN, Laible PD, Hanson DK. 2003. Sequences of versatile broad-host-range vectors of the RK2 family. *Plasmid* 50:74-9.
